# Supplementary material
Source: Springer Nature journal article supplement (https://www.springermedizin.de/resource/supplementary/12950_2013_358_MOESM2_ESM.pdf/9557650)

**A**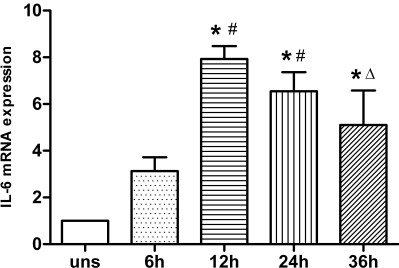**B**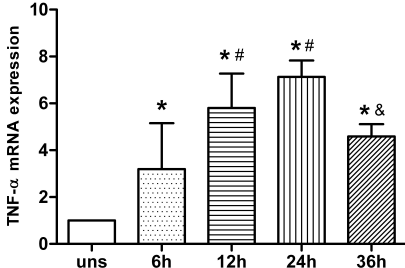**C**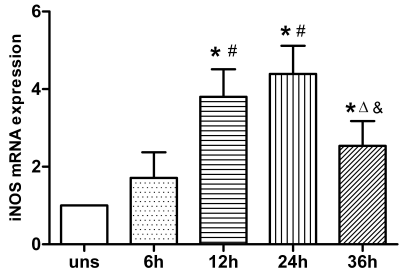

Supplement: MOESM2 [file 9557650]
